# Supplementary material for: Efficient production of acrylic acid by dehydration of lactic acid over BaSO4with crystal defects
Source: Royal Society of Chemistry journal article supplement (doi:10.1039/c6ra28429a), 2017-01-01
Supplement: c6ra28429a1.pdf [file c6ra28429a1.pdf]

## Supplementary Information

### Efficient production of acrylic acid by dehydration of lactic acid over $\text{BaSO}_4$ with crystal defects

Shuting Lyu, Tiefeng Wang\*

*Beijing Key Laboratory of Green Reaction Engineering and Technology*

*Department of Chemical Engineering, Tsinghua University, Beijing 100084, China*

\*Corresponding author: [wangtf@tsinghua.edu.cn](mailto:wangtf@tsinghua.edu.cn)

Table S1. Catalytic performance and carbon balance of all the catalysts <sup>a</sup>

| Catalyst         | WHSV<br>(h <sup>-1</sup> ) | Conversion<br>(%) | Selectivity (%) |      |      |     | Carbon<br>deposits | Carbon<br>balance<br>(%) |
|------------------|----------------------------|-------------------|-----------------|------|------|-----|--------------------|--------------------------|
|                  |                            |                   | AA              | AD   | AcOH | PA  |                    |                          |
| Commercial       | 2.5                        | 29.8              | 28.8            | 41.2 | 8.2  | 4.5 | 0.3                | 83.0                     |
| Co-pre           | 2.5                        | 69.5              | 65.8            | 23.2 | 5.1  | 1.9 | 0.3                | 96.3                     |
| Water/ult        | 2.5                        | 70.1              | 69.7            | 18.0 | 3.9  | 1.5 | 0.3                | 93.4                     |
| EtOH/ult-0h-500  | 2.5                        | 77.6              | 78.9            | 12.7 | 3.2  | 2.2 | 0.3                | 97.3                     |
| EtOH/ult-0h-500  | 5.0                        | 66.1              | 76.7            | 16.4 | 2.9  | 2.0 | 0.2                | 98.2                     |
| EtOH/ult-1h-500  | 5.0                        | 56.2              | 70.5            | 18.2 | 3.0  | 3.0 | 0.2                | 94.9                     |
| EtOH/ult-2h-500  | 5.0                        | 52.6              | 65.7            | 17.2 | 3.2  | 2.7 | 0.2                | 89.0                     |
| EtOH/ult-24h-500 | 5.0                        | 51.7              | 58.6            | 15.2 | 2.7  | 1.4 | 0.2                | 78.1                     |
| EtOH/ult-0h-350  | 5.0                        | 72.9              | 66.4            | 17.4 | 3.1  | 1.0 | 0.3                | 88.2                     |
| EtOH/ult-0h-600  | 5.0                        | 45.8              | 59.2            | 20.5 | 3.5  | 2.3 | 0.2                | 85.7                     |
| EtOH/ult-0h-700  | 5.0                        | 28.2              | 59.4            | 21.3 | 6.6  | 3.8 | 0.1                | 91.2                     |

<sup>a</sup> Conditions: reaction temperature 350 °C, feed flow rate: 1.2 mL/h, LA feedstock: 20 wt% in water, carrier gas N<sub>2</sub>: 30 mL/min.

Table S2. Catalytic performance at different reaction temperatures<sup>a</sup>

| Reaction temperature (°C) | Conversion (%) | Selectivity (%) |      |      |     | Carbon balance (%) |
|---------------------------|----------------|-----------------|------|------|-----|--------------------|
|                           |                | AA              | AD   | AcOH | PA  |                    |
| 300                       | 51.6           | 33.5            | 33.6 | 1.7  | 1.2 | 70.1               |
| 350                       | 77.6           | 78.9            | 12.7 | 3.2  | 2.2 | 97.3               |
| 400                       | 93.4           | 67.7            | 18.0 | 5.6  | 4.8 | 96.4               |

<sup>a</sup> Conditions: EtOH/ult-0h-500, WHSV = 2.5 h<sup>-1</sup>, feed flow rate: 1.2 mL/h, LA feedstock: 20 wt% in water, carrier gas N<sub>2</sub>: 30 mL/min, TOS = 4-9 h.

Table S3. Catalytic performance at different WHSV<sup>a</sup>

| WHSV (h <sup>-1</sup> ) | Conversion (%) | Selectivity (%) |      |      |     | Carbon balance (%) |
|-------------------------|----------------|-----------------|------|------|-----|--------------------|
|                         |                | AA              | AD   | AcOH | PA  |                    |
| 0.8                     | 97.5           | 77.7            | 13.5 | 1.2  | 1.0 | 94.0               |
| 1.3                     | 88.9           | 78.8            | 14.6 | 3.5  | 1.9 | 99.3               |
| 2.5                     | 77.6           | 78.9            | 12.7 | 3.2  | 2.2 | 97.3               |
| 5.0                     | 66.1           | 76.7            | 16.4 | 2.9  | 2.0 | 98.2               |

<sup>a</sup> Conditions: EtOH/ult-0h-500, reaction temperature 350 °C, feed flow rate: 1.2 mL/h, LA feedstock: 20 wt% in water, carrier gas N<sub>2</sub>: 30 mL/min, TOS = 4-9 h.

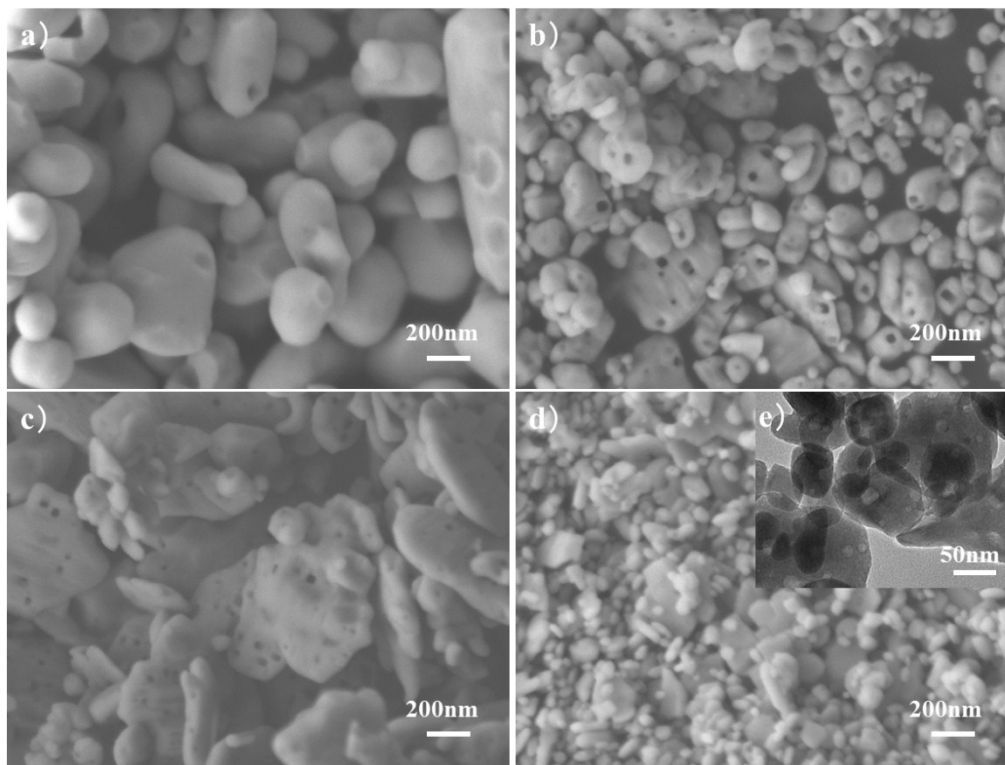

Figure S1. SEM images of BaSO<sub>4</sub> catalysts prepared with different methods  
(a) Commercial, (b) Co-pre, (c) Water/ult, (d) EtOH/ult-0h-500, and (e) TEM image of EtOH/ult-0h-500

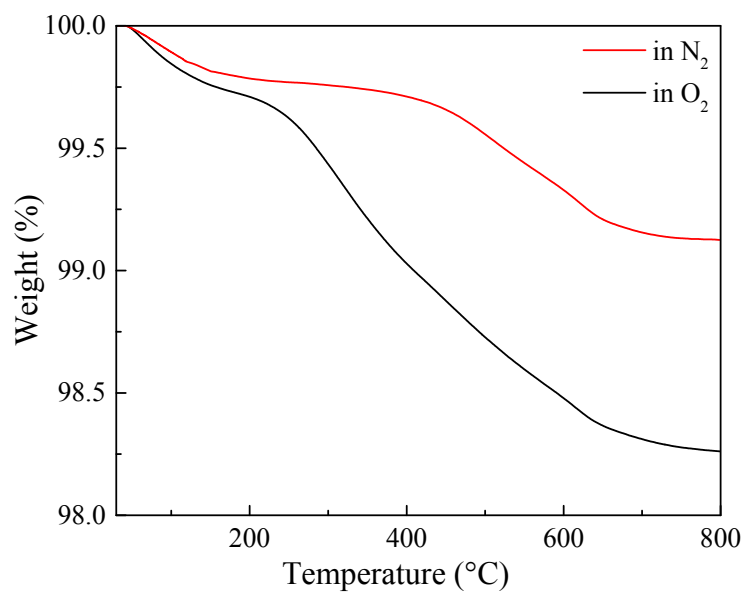

Figure S2. TGA profiles of EtOH/ult-350 in N<sub>2</sub> and O<sub>2</sub> atmosphere

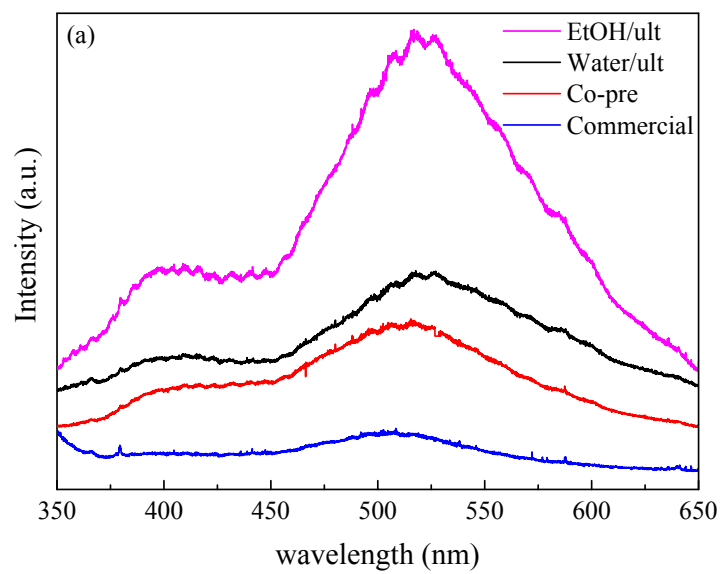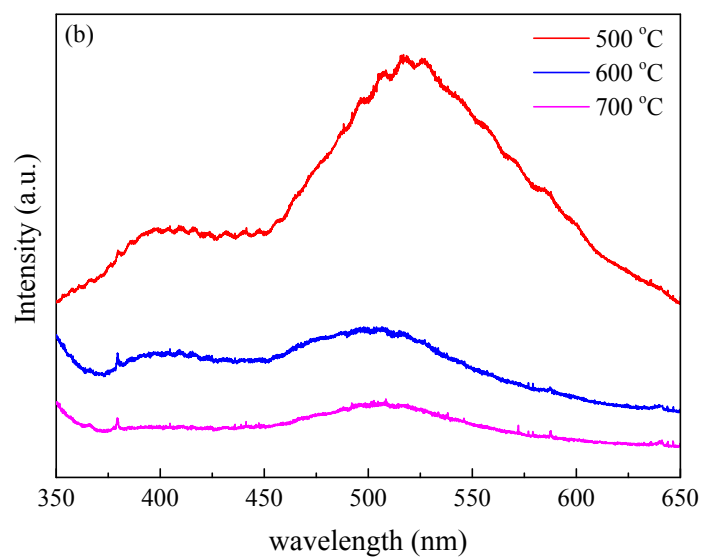

Figure S3. Photoluminescence (PL) spectra of EtOH/ult (a) prepared with different methods and (b) calcined at different temperatures

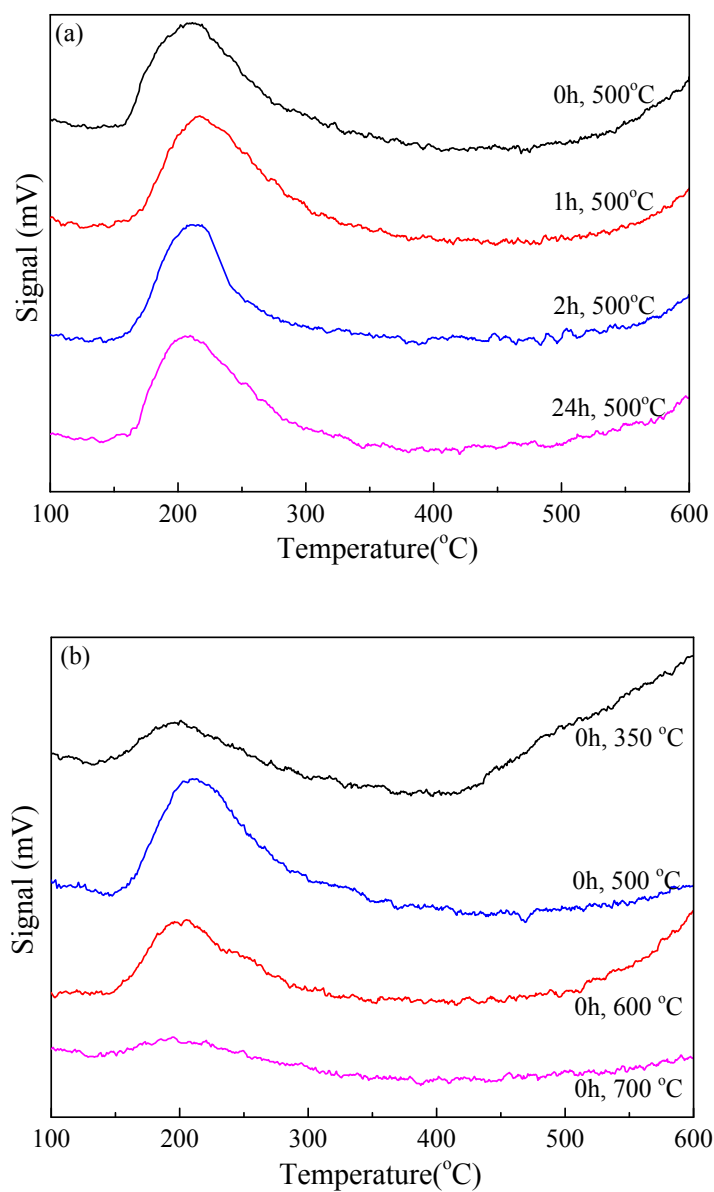

Figure S4. NH<sub>3</sub>-TPD profiles of BaSO<sub>4</sub> catalysts (a) with different aging time and (b) calcined at different temperature



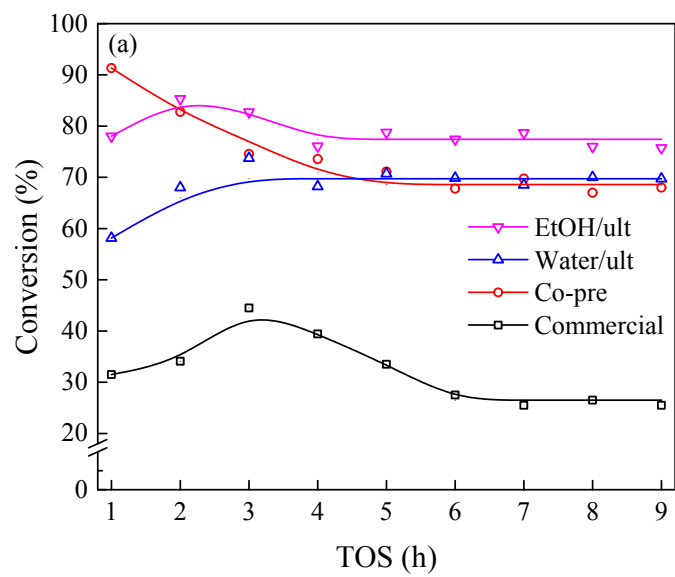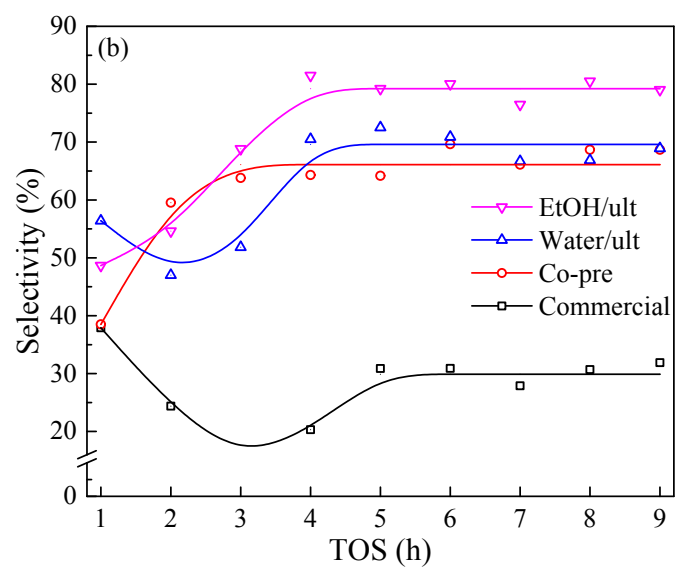

Figure S5. Performance of BaSO<sub>4</sub> catalysts prepared with different methods.

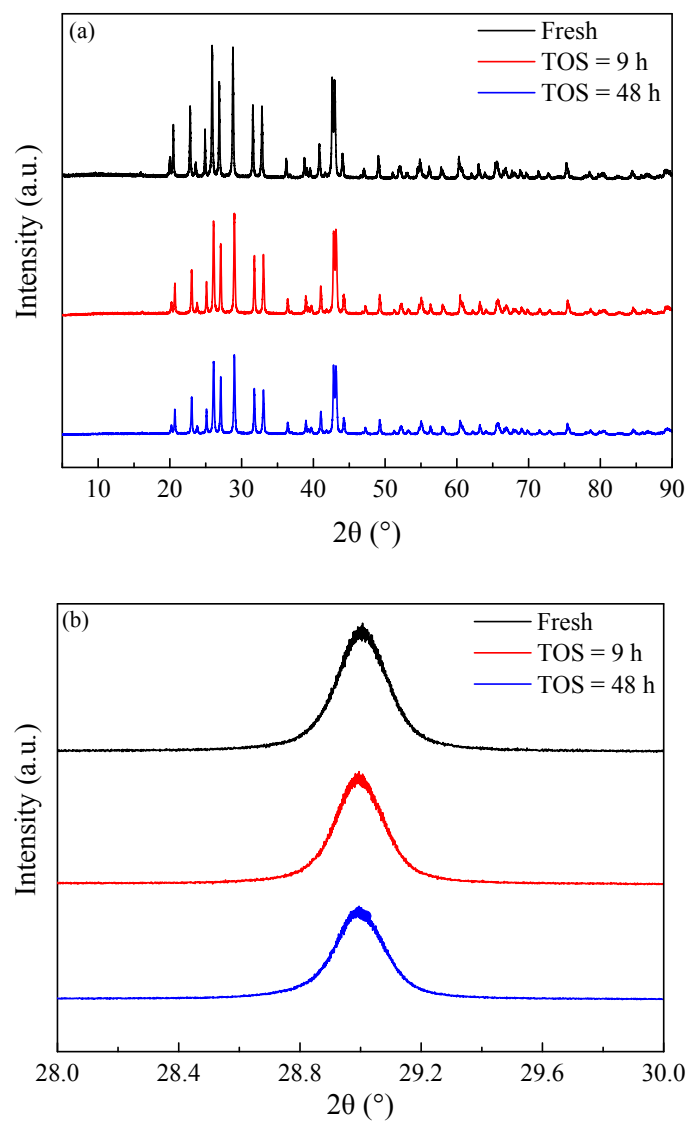

Figure S6. (a) XRD patterns and (b) enlarged (121) diffraction peaks of the fresh and spent EtOH/ult-0h-500 catalysts.
